# Supplementary material for: Overexpression of OsGID1 Enhances the Resistance of Rice to the Brown Planthopper Nilaparvata lugens
Source: PubMed Central journal article supplement (PMC6164479; doi:10.3390/ijms19092744), 2018-09-13
Supplement: ijms-19-02744-s001.pdf [file ijms-19-02744-s001.pdf]

# Supplementary Materials: **Overexpression of *OsGID1* Enhances the Resistance of Rice to the Brown Planthopper *Nilaparvata lugens***

**Lin Chen, Tiantian Cao, Jin Zhang and Yonggen Lou**

State Key Laboratory of Rice Biology & Ministry of Agriculture Key Lab of Molecular Biology of Crop Pathogens and Insects, Institute of Insect Sciences, Zhejiang University, Hangzhou 310058, China

Correspondence: Prof. Yonggen LOU, [yglou@zju.edu.cn](mailto:yglou@zju.edu.cn)

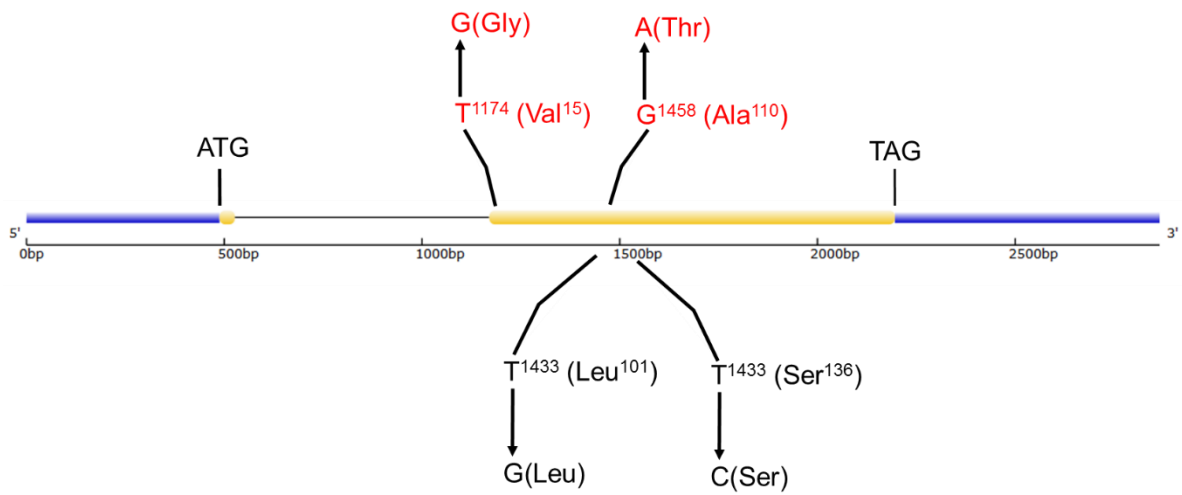

**Supplemental Figure S1.** The structure of *OsGID1* and single nucleotide polymorphisms (SNPs) in its coding sequence. The *OsGID1* consists of two exons (yellow boxes) and one intron (thin line); upstream and downstream regions, including untranslated regions, are showing in blue boxes. Missense and synonymous nucleotide substitutions of the four SNPs are indicated in red and dark.

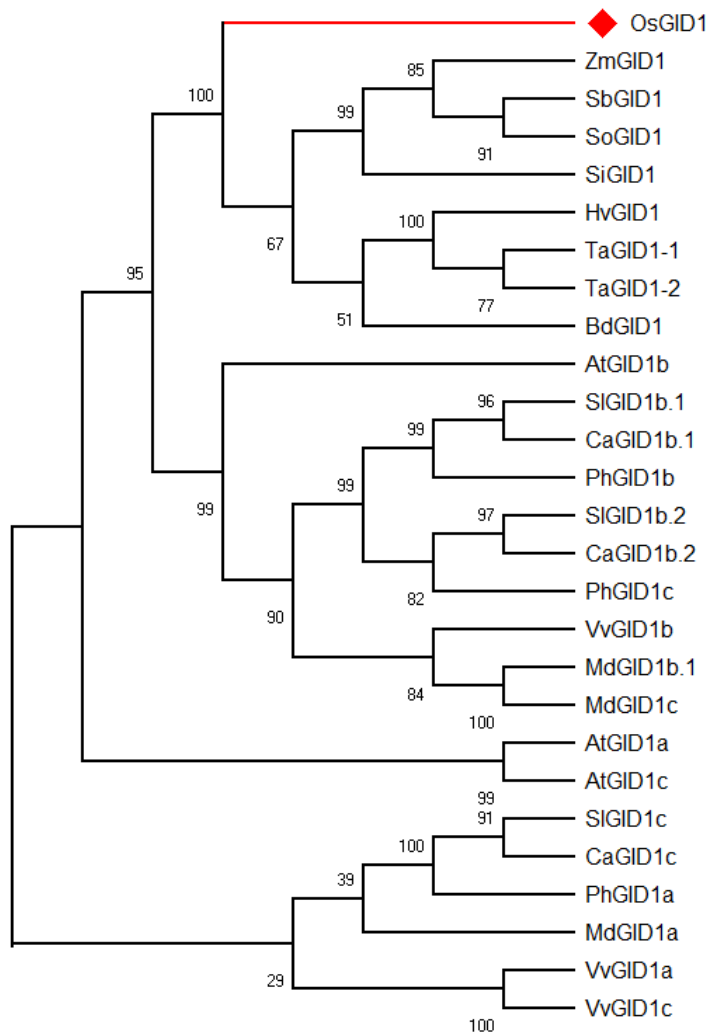

**Supplemental Figure S2.** Phylogenetic analysis of GID1 proteins from different plant species. The unrooted tree was constructed with a neighbor-joining method on the basis of the alignment of protein sequences and confirmation of the tree topology by bootstrap analysis (1,000 replicates) were performed with MEGA X software (default settings except the replicates of the bootstrap value). Species acronyms are included before the protein name: Os, *Oryza sativa*; At, *Arabidopsis thaliana*; Zm, *Zea mays*; Hv, *Hordeum vulgare*; Si, *Setaria italic*; Sb, *Sorghum bicolor*; So, *Saccharum officinarum*; Bd, *Brachypodium distachyon*; Ta, *Triticum aestivum*; Sl, *Solanum lycopersicum*; Vv, *Vitis vinifera*; Md, *Malus domestica*; Ca, *Capsicum annum*; Ph, *Petunia x hybrid*. Sequence data in the phylogenetic tree can be found in the GenBank/EMBL data libraries under accession numbers: OsGID1 (NP\_001055520.1); AtGID1a (NP\_187163.1), AtGID1b NP\_191860.1, AtGID1c (NP\_198084.1); ZmGID1 (CAP64327.1); HvGID1 (CAO98733.1); SiGID1 (XP\_004962116.1); SbGID1 (XP\_021303311.1); SoGID1 (CAP64326.1); BdGID1 (XP\_003568469.1); TaGID1-1 (CBW30246.1), TaGID1-2 (CBW30247.1); SIGID1b.1 (XP\_004240525.1), SIGID1b.2 (NP\_001234767.2), SIGID1c (XP\_004230154.1); VvGID1a (AFG17072.1), VvGID1b (XP\_002271700.1), VvGID1c (XP\_002265764.1); MdGID1a (NP\_001281280.1), MdGID1b (AFD32891.1), MdGID1c (AFD32892.1); CaGID1b.1 (ALY05368.1), CaGID1b.2 (ALY05369.1), CaGID1c (ALY05370.1); PhGID1a (AGN72648.1), PhGID1b (AGN72649.1), PhGID1c (AGN72650.1). The OsGID1s is indicated with red ♦.

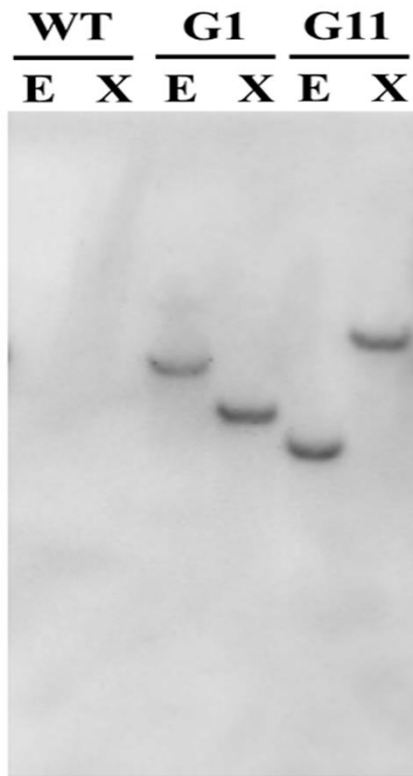

**Supplemental Figure S3.** DNA gel-blot analysis of oe-GID1 lines, G1, G11 and WT plants. Genomic DNA extracted from oe-GID1 and WT plants was digested with *EcoR* I (E) and *Xba* I (X). The blot was hybridized with a probe specific for reporter gene *GUS*. All overexpression lines have a single insertion of *OsGID1*.

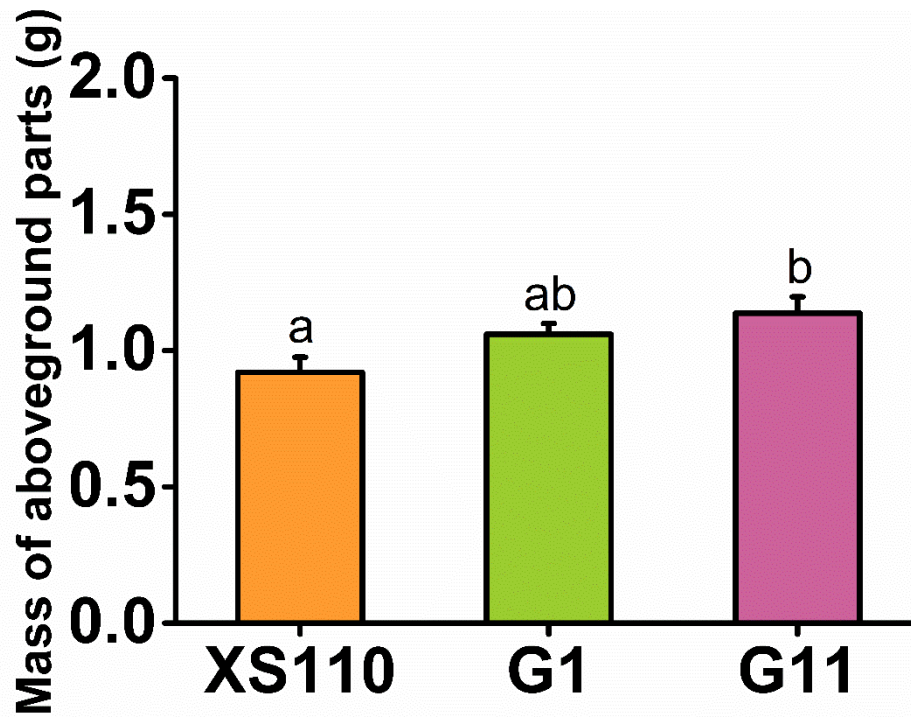

**Supplemental Figure S4.** Mean mass (+ SE,  $n = 20$ ) of the above-ground part of 38-day-old plants of *oe-GID1* and WT lines. Different letters indicate significant differences among lines (Duncan's multiple range test,  $P < 0.05$ ).

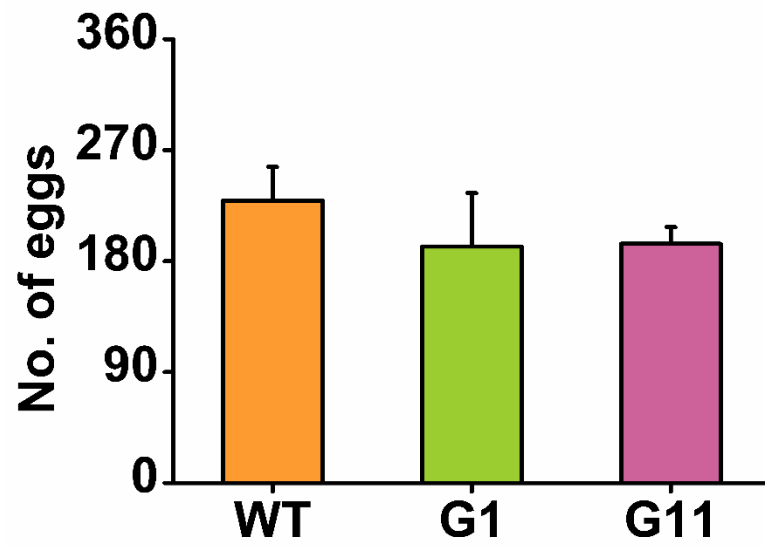

**Supplemental Figure S5.** Mean number (+ SE, n = 5) of eggs laid by 15 gravid BPH females on oe-GID1 and WT plants for 12 h.

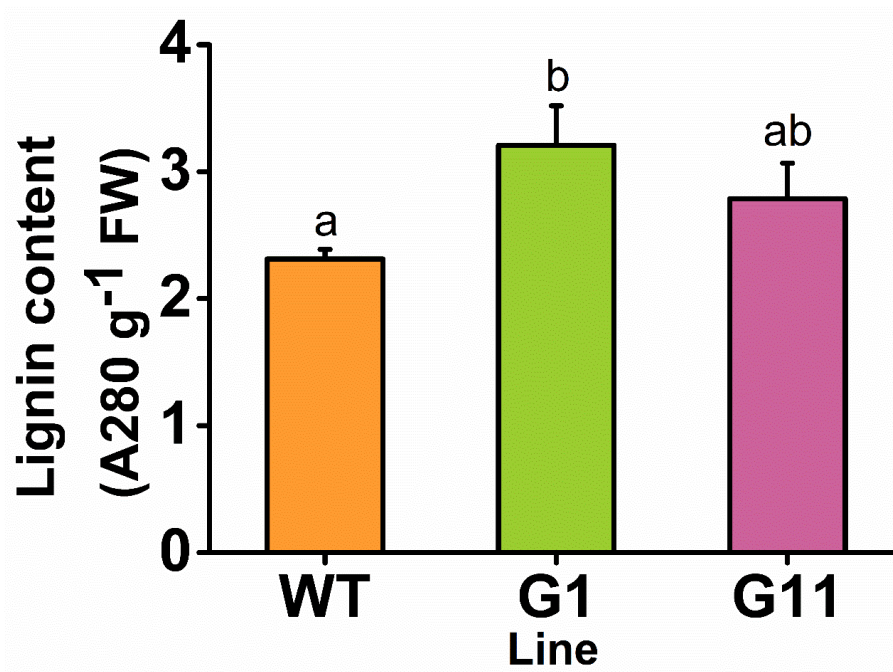

**Supplemental Figure S6.** Constitutive levels of Lignin in WT and oe-GID1 plants.

Mean constitutive levels (+SE, n = 5) of lignin in leaf sheaths of 4-week-old plants of oe-GID1 and WT lines. Different letters indicate significant differences among lines (Duncan's multiple range test,  $P < 0.05$ ).

Table S1. Primers and probes used for qRT-PCR of target genes

| Gene            | TIGR ID    | Primer (5'-3')                                          | Probe (5'-3')              |
|-----------------|------------|---------------------------------------------------------|----------------------------|
| <i>ACTIN</i>    | Os03g50885 | FP: TGGACAGGTTATCACCAATTGGT<br>RP: CCGCAGCTTCCATTCTATG  | CGTTCCGCTGCCCTGAGGTCC-BHQ1 |
| <i>OsWRKY13</i> | Os01g54600 | FP: GCGCAAGTACGGCCAGAA<br>RP: CCTTGGAGCTACTGCACCTGTA    | CCCATCAAGGGCTCTCCCTACCCA   |
| <i>OsWRKY30</i> | Os08g38990 | FP: AACAGTGGCCACCCAAGCT<br>RP: GTTCAGGTCTCCGGTGAAGAAG   | AGGCTCAGCCGCTGCACCACA      |
| <i>OsWRKY33</i> | Os03g33012 | FP: AGGCAAGCACAGCCATGAC<br>RP: GAAGACGATACGTTGGCATTAGC  | CCAGCAGCCAGGAACAGTAGCCATTC |
| <i>OsGID1</i>   | Os05g33730 | FP: ACCGCAACGAGTGCAAGAC<br>RP: TTGTACGACAGCTTGAAGTTGGA  | CCGCTCCACACATGGGTGCTCA     |
| <i>OsICS1</i>   | Os09g19734 | FP: ACCAATTATGTTCCGATCAATCA<br>RP: CGTCGCCTTCTTGATTTATG | ACACCTCCTACATACGCAGCCGCTGA |
| <i>OsC4H</i>    | Os01g60450 | FP: GTGTACCGCATCATGTTT<br>RP: GAAGTCGCCGTAGTTGTA        |                            |
| <i>OsACS2</i>   | Os04g48850 | FP: CACCCGAGGCATCCAT<br>RP: ATTGGCGATCCTCTTGAAGT        | TGCACACCGGAGGGCGTCT        |
